# Supplementary material for: Identification of sonic hedgehog-regulated genes and biological processes in the cranial neural crest mesenchyme by comparative transcriptomics
Source: PubMed Central journal article supplement (PMC6020285; doi:10.1186/s12864-018-4885-5), 2018-06-27
Supplement: 12864_2018_4885_MOESM9_ESM.pdf [file 12864_2018_4885_MOESM9_ESM.pdf]

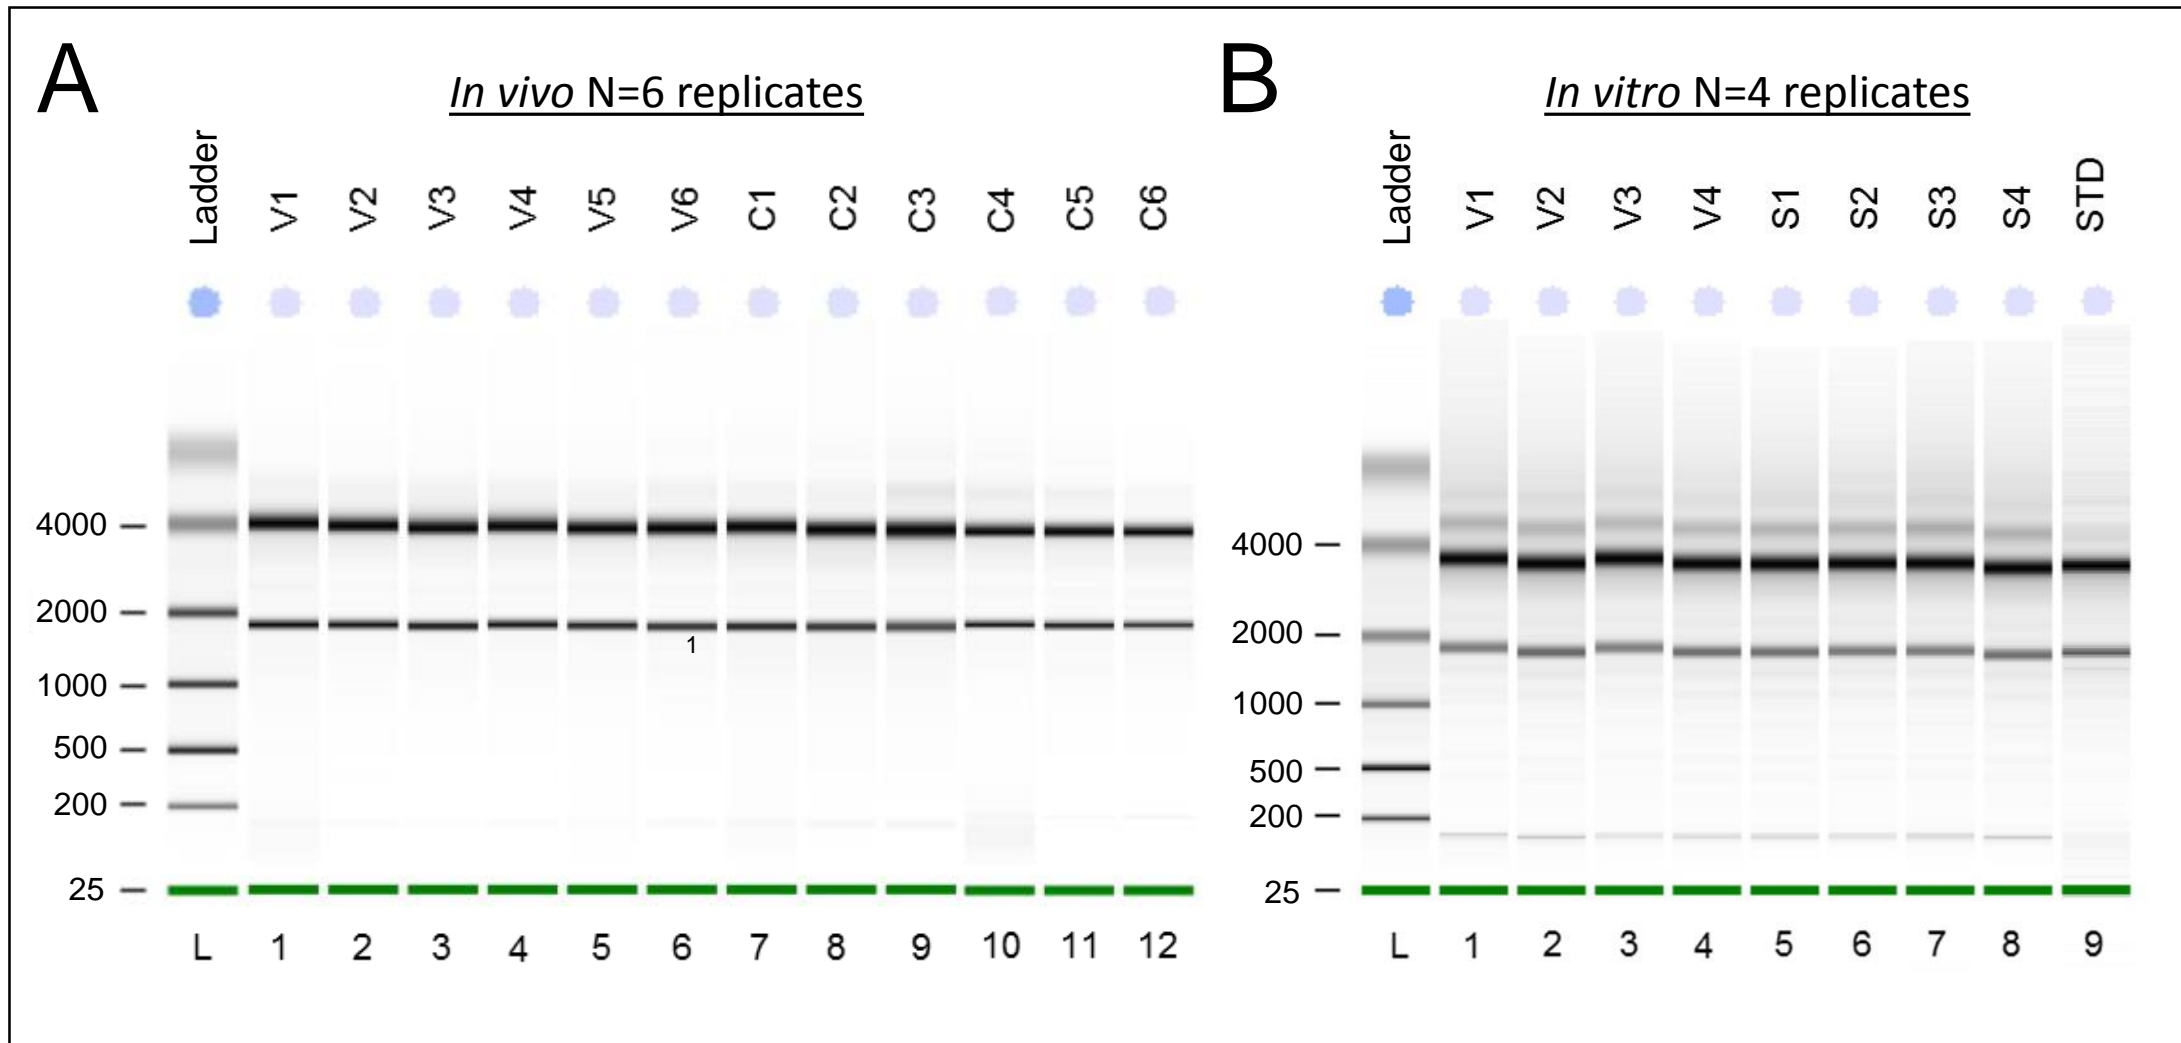

**RNA quality assessment.** RNA quality was analyzed with an Agilent Bioanalyzer 2100 showing high quality RNA for all (A) 12 *in vivo* samples (V1-V6, C1-C6), (B) 8 *in vitro* samples (V1-V4, S1-S4) and an RNA standard (STD). V=vehicle, C=cycloamine, S=SHH, L=ladder.
